# Supplementary material for: Research on Labor Market Institutional Environment and Labor Agglomeration—Analysis Based on Dynamic Spatial Panel Data
Source: Front Sociol. 2021 Oct 8;6:738134. doi: 10.3389/fsoc.2021.738134 (PMC8531718; doi:10.3389/fsoc.2021.738134)
Supplement: Supplementary file 1 [file DataSheet1.xlsx]

## Sheet: Sheet1
year	region	region code	jal(rate of closing cases	ss(finance expenditure)	gdp（100 millions yuan）	invest（100 millions yuan）	rd（patient）	total employed population（10 thounds）	export（thound dollars）
2001	beijing	1	0.959989	559.11	3707.96	1513.32	6246	628.9	11786870
2002	beijing	1	0.975029	628.35	4315	1796.14	6345	679.2	12613860
2003	beijing	1	0.980914	734.8	5007.21	2169.26	8248	703.3	16886820
2004	beijing	1	0.987192	898.28	6033.21	2528.21	9005	854.1	20569256
2005	beijing	1	0.989571	1058.31	6969.52	2827.23	10100	878.0	30865901
2006	beijing	1	0.995805	1296.84	8117.78	3296.38	11238	919.7	37953979
2007	beijing	1	0.994405	1649.5	9846.81	3907.2	14954	942.7	48926394
2008	beijing	1	0.898502	1959.29	11115	3814.73	17747	980.9	57499609
2009	beijing	1	0.874113	2319.37	12153	4616.92	22921	998.3	48379320
2010	beijing	1	1.1675	2717.32	14113.6	5402.95	33511	1031.6	55436211
2011	beijing	1	1.01113	3245.23	16251.9	5578.93	40888	1069.7	58997146
2012	beijing	1	1.01122	3685.31	17879.4	6112.4	50511	1107.3	59632089
2013	beijing	1	1.0028	4173.66	19800.8	6847.06	62671	1141.0	63097561
2014	beijing	1	0.986403	4524.67	21330.8	6924.23	74661	1156.7	62338417
2015	beijing	1	0.994811	5737.7	23014.6	7495.99	94031	1186.1	54666817
2016	beijing	1	0.988092	6406.77	25669.1	7943.89	100578	1220.1	52022843
2017	beijing	1	1.00063	6824.53	28014.9	8370.44	106948	1246.8	58565988
2001	tianjin	2	0.880524	234.67	1919.09	705	1829	488.34	9492110
2002	tianjin	2	0.79964	265.21	2150.76	807.51	1827	492.61	11631690
2003	tianjin	2	0.880675	312.08	2578.03	1039.39	2505	510.90	14349400
2004	tianjin	2	0.912365	375.02	3110.97	1245.66	2578	527.78	20851752
2005	tianjin	2	0.91639	442.12	3905.64	1495.14	3045	542.52	27380881
2006	tianjin	2	0.94333	543.12	4462.74	1820.52	4159	562.92	33490776
2007	tianjin	2	0.891528	674.33	5252.76	2353.15	5584	613.93	38074052
2008	tianjin	2	0.816757	867.72	6719.01	3389.79	6790	647.32	42102991
2009	tianjin	2	0.946323	1124.28	7521.85	4738.2	7404	677.13	29892720
2010	tianjin	2	0.99716	1376.84	9224.46	6278.09	11006	728.70	37484826
2011	tianjin	2	1.01419	1796.33	11307.3	7067.67	13982	763.16	44481941
2012	tianjin	2	1.0331	2143.21	12893.9	7934.8	19782	803.14	48312563
2013	tianjin	2	1.08606	2549.21	14442	9130.25	24856	847.46	49004938
2014	tianjin	2	0.986811	2884.7	15726.9	10518.2	26351	877.21	52590658
2015	tianjin	2	1.0089	3232.35	16538.2	11832	37342	896.80	51162928
2016	tianjin	2	0.977998	3699.43	17885.4	12779.4	39734	902.42	44278694
2017	tianjin	2	1.02841	3282.54	18549.2	11288.9	41675	894.83	43561054
2001	hebei	3	0.981855	514.18	5516.76	1912.53	2791	3409.16	3955590
2002	hebei	3	0.996436	576.59	6018.28	2020.38	3353	3435.00	4594110
2003	hebei	3	0.994826	646.74	6921.29	2477.98	3572	3470.23	5927540
2004	hebei	3	0.987913	785.56	8477.63	3218.76	3407	3516.71	9339259
2005	hebei	3	0.985167	979.16	10012.1	4139.69	3585	3568.97	10924299
2006	hebei	3	0.989472	1180.36	11467.6	5470.24	4131	3609.99	12833996
2007	hebei	3	0.995013	1506.65	13607.3	6884.68	5358	3664.97	17000406
2008	hebei	3	0.946059	1881.67	16012	8866.56	5496	3725.66	24004121
2009	hebei	3	0.954271	2347.59	17235.5	12269.8	6839	3792.49	15688900
2010	hebei	3	1.08744	2820.24	20394.3	15083.4	10061	3865.14	22556443
2011	hebei	3	1.00032	3537.39	24515.8	16389.3	11119	3962.42	28569849
2012	hebei	3	0.970445	4079.44	26575	19661.3	15315	4085.74	29598202
2013	hebei	3	0.977587	4409.58	28443	23194.2	18186	4183.93	30960609
2014	hebei	3	1.07666	4677.3	29421.2	26671.9	20132	4202.66	35710195
2015	hebei	3	1.00691	5632.19	29806.1	29448.3	30130	4212.50	32932763
2016	hebei	3	1.03146	6049.53	32070.5	31750	31826	4223.95	30575538
2017	hebei	3	1.00055	6639.18	34016.3	33406.8	35348	4206.66	31357403
2001	shanxi	4	0.937226	289.5	2029.53	663.58	1047	1399.5	1468240
2002	shanxi	4	1.02573	334.27	2324.8	813.36	934	1403.34	1661610
2003	shanxi	4	0.985958	415.69	2855.23	1100.86	1175	1469.5	2272020
2004	shanxi	4	0.94	519.06	3571.37	1443.88	1189	1474.6	4034468
2005	shanxi	4	0.949809	668.75	4230.53	1826.58	1220	1500.2	3528494
2006	shanxi	4	1.07309	915.57	4878.61	2255.74	1421	1561.16	4139625
2007	shanxi	4	1	1049.92	6024.45	2861.46	1992	1595.65	6532492
2008	shanxi	4	0.981358	1315.02	7315.4	3531.16	2279	1614.10	9253116
2009	shanxi	4	1.01816	1561.7	7358.31	4943.16	3227	1630.60	2837460
2010	shanxi	4	1.02206	1931.36	9200.86	6063.17	4752	1685.90	4702815
2011	shanxi	4	1.05684	2363.85	11237.5	7073.06	4974	1738.9	5425124
2012	shanxi	4	0.99936	2759.46	12112.8	8863.3	7196	1790.2	7016041
2013	shanxi	4	0.958468	3030.13	12665.2	11031.9	8565	1844.2	7995574
2014	shanxi	4	0.993021	3085.28	12761.5	12354.5	8371	1862.3	8940869
2015	shanxi	4	1.04344	3422.97	12766.5	14074.1	10020	1872.8	8420768
2016	shanxi	4	1.013	3428.86	13050.4	14198	10062	1908.2	9932190
2017	shanxi	4	1.00144	3756.42	15528.4	6040.54	11311	1914.1	10195611
2001	neimenggu	5	0.986019	319.26	1713.81	503.63	743	1067.0	627070
2002	neimenggu	5	0.98295	393.57	1940.94	707.91	679	1086.1	806670
2003	neimenggu	5	0.958018	447.26	2388.38	1174.66	817	1005.2	1155690
2004	neimenggu	5	0.997463	564.11	3041.07	1787.95	831	1026.1	1354465
2005	neimenggu	5	0.996173	681.88	3905.03	2643.6	845	1041.1	1773624
2006	neimenggu	5	0.960084	812.13	4944.25	3363.21	978	1051.2	2140501
2007	neimenggu	5	0.98801	1082.31	6423.18	4372.88	1313	1081.5	2944394
2008	neimenggu	5	0.931715	1454.57	8496.2	5475.41	1328	1103.3	3591850
2009	neimenggu	5	0.971249	1926.84	9740.25	7336.79	1494	1142.5	2315480
2010	neimenggu	5	1.02605	2273.5	11672	8926.46	2096	1184.7	3334426
2011	neimenggu	5	1.00633	2989.21	14359.9	10365.2	2262	1249.3	4686973
2012	neimenggu	5	0.979842	3425.99	15880.6	11875.7	3084	1304.9	3970163
2013	neimenggu	5	0.97695	3686.52	16916.5	14217.4	3836	1408.2	4092561
2014	neimenggu	5	0.989241	3879.98	17770.2	17591.8	4031	1485.4	6393548
2015	neimenggu	5	1.00418	4252.96	17831.5	13702.2	5522	1463.7	5650008
2016	neimenggu	5	0.981115	4512.71	18128.1	15080	5846	1474.0	4395988
2017	neimenggu	5	1.02634	4529.93	16096.2	14013.2	6271	1424.9	4877962
2001	liaoning	6	0.975962	635.43	5033.08	1421.19	4448	2069.3	11008450
2002	liaoning	6	0.94677	690.92	5458.22	1605.55	4551	2025.3	12366560
2003	liaoning	6	0.9922	784.38	6002.54	2076.36	5656	2018.9	14579350
2004	liaoning	6	1.01846	931.4	6672	2979.59	5749	2097.3	18913506
2005	liaoning	6	0.968236	1204.36	8047.26	4200.45	6195	2120.3	23438322
2006	liaoning	6	0.846203	1422.75	9304.52	5689.64	7399	2128.1	28319415
2007	liaoning	6	0.899905	1764.28	11164.3	7435.23	9615	2180.7	35324089
2008	liaoning	6	0.904562	2153.43	13668.6	10019.1	10665	2198.2	42069497
2009	liaoning	6	1.05106	2682.39	15212.5	12292.5	12198	2277.1	33414930
2010	liaoning	6	1.00303	3195.82	18457.3	16043	17093	2317.5	43098711
2011	liaoning	6	1.01404	3905.85	22226.7	17726.3	19176	2364.9	51042356
2012	liaoning	6	1.02654	4558.59	24846.4	21836.3	21223	2423.8	57959053
2013	liaoning	6	1.00363	5197.42	27213.2	25107.7	21656	2518.9	64522007
2014	liaoning	6	0.988325	5080.49	28626.6	24730.8	19525	2562.2	58745183
2015	liaoning	6	1.00445	4481.61	28669	17917.9	25182	2409.9	50710982
2016	liaoning	6	1.01985	4577.47	22246.9	6692.25	25104	2301.2	43062765
2017	liaoning	6	0.994226	4879.42	23409.2	6676.74	26495	2284.7	44865918
2001	jilin	7	0.950773	326.43	2120.35	701.7	1443	1167.41	1461710
2002	jilin	7	0.950339	362.62	2348.54	834.23	1507	1186.6	1768490
2003	jilin	7	1.03504	409.23	2662.08	969.03	1690	1202.5	2182280
2004	jilin	7	1.17939	507.78	3122.01	1169.1	2145	1222	1714747
2005	jilin	7	0.92031	631.12	3620.27	1741.09	2023	1238.9	2466156
2006	jilin	7	0.938672	718.36	4275.12	2594.34	2319	1250.5	2996646
2007	jilin	7	1.04169	883.76	5284.69	3651.36	2855	1266.1	3857056
2008	jilin	7	0.967475	1180.12	6426.1	5038.92	2984	1281.4	4771629
2009	jilin	7	1.0014	1479.21	7278.75	6411.6	3275	1297.3	3124940
2010	jilin	7	0.993225	1787.25	8667.58	7870.38	4343	1311.6	4475849
2011	jilin	7	0.947751	2201.74	10568.8	7441.71	4920	1337.78	4997715
2012	jilin	7	0.945685	2471.2	11939.2	9511.5	5930	1355.9	5982684
2013	jilin	7	1.06538	2744.81	13046.4	9979.26	6219	1415.43	6738906
2014	jilin	7	0.974313	2913.25	13803.1	11339.6	6696	1447.17	5777591
2015	jilin	7	1.00089	3217.1	14063.1	12705.3	8878	1480.6	4613753
2016	jilin	7	0.972066	3586.09	14776.8	13923.2	9995	1501.73	4202011
2017	jilin	7	1.02525	3725.72	14944.5	13283.9	11090	1488.53	4419364
2001	heilongjiang	8	0.968696	478.27	3390.1	963.58	1870	1592.6	963.58
2002	heilongjiang	8	0.975645	531.87	3637.2	1046.17	2083	1588.6	1046.17
2003	heilongjiang	8	0.984474	564.91	4057.4	1166.18	2794	1623.3	1166.18
2004	heilongjiang	8	1.02936	697.55	4750.6	1430.82	2809	1681	1430.82
2005	heilongjiang	8	0.824518	787.79	5513.7	1737.27	2906	1748.8	1737.27
2006	heilongjiang	8	1.03661	968.53	6211.8	2236	3622	1784	2236
2007	heilongjiang	8	0.970069	1187.27	7104	2833.5	4303	1827.6	2833.5
2008	heilongjiang	8	0.991609	1542.3	8314.37	3655.97	4574	1852.4	3655.97
2009	heilongjiang	8	0.966178	1877.74	8587	5028.83	5079	1877	5028.83
2010	heilongjiang	8	0.990421	2253.27	10368.6	6812.56	6780	1932	6812.56
2011	heilongjiang	8	0.968528	2794.08	12582	7475.38	12236	1977.8	7475.38
2012	heilongjiang	8	1.00647	3171.52	13691.6	9694.7	20268	2027.8	9694.7
2013	heilongjiang	8	1.01072	3369.18	14454.9	11453.1	19819	2060.4	11453.1
2014	heilongjiang	8	0.986399	3434.22	15039.4	9828.99	15412	2079.8	9828.99
2015	heilongjiang	8	1.00642	4020.66	15083.7	10183	18943	2013.7	10183
2016	heilongjiang	8	1.00206	4227.34	15386.1	10648.4	18046	2028.2	10648.4
2017	heilongjiang	8	1.02453	4641.08	15902.7	11292	18221	2005	11292
2001	shanghai	9	0.991661	708.14	5210.12	2004.64	5371	752.26	27623670
2002	shanghai	9	1.01223	862.38	5741.03	2213.72	6695	792.04	32037390
2003	shanghai	9	0.987713	1088.44	6694.23	2499.14	16671	813.05	48452960
2004	shanghai	9	0.999279	1382.53	8072.83	3050.26	10625	836.87	73505255
2005	shanghai	9	0.977833	1646.26	9247.66	3509.66	12603	863.32	90717519
2006	shanghai	9	0.970172	1795.57	10572.2	3900.04	16602	885.51	113589268
2007	shanghai	9	0.933808	2181.68	12494	4420.37	24481	1024.33	143846108
2008	shanghai	9	0.730381	2593.92	14069.9	4823.15	24468	1053.24	169145142
2009	shanghai	9	1.26758	2989.65	15046.5	5043.75	34913	1064.42	141796030
2010	shanghai	9	1.05594	3302.89	17166	5108.9	48215	1090.76	180713982
2011	shanghai	9	1.01692	3914.88	19195.7	4962.07	47960	1104.33	209673843
2012	shanghai	9	0.992401	4184.02	20181.7	5117.6	51508	1115.50	206730168
2013	shanghai	9	1.00222	4528.61	21818.2	5647.79	48680	1137.35	204180026
2014	shanghai	9	0.977468	4923.44	23567.7	6016.43	50488	1365.63	210133864
2015	shanghai	9	0.997409	6191.56	25123.5	6352.7	60623	1361.51	195913212
2016	shanghai	9	0.990224	6918.94	28178.7	6755.88	64230	1365.24	183352132
2017	shanghai	9	1.01835	7547.62	30633	7246.6	72806	1372.65	193642899
2001	jiangsu	10	0.981066	729.64	9456.84	2823.2	6158	4436.45	28873540
2002	jiangsu	10	1.00677	860.25	10606.9	3450.12	7595	4472.84	38465120
2003	jiangsu	10	1.03084	1047.68	12442.9	5233	9840	4499.97	59113020
2004	jiangsu	10	0.985116	1312.04	15003.6	6557.05	11330	4537.07	87494225
2005	jiangsu	10	0.995883	1673.4	18598.7	8165.38	13580	4578.75	122966712
2006	jiangsu	10	0.981925	2013.25	21742	10069.2	19352	4628.95	160409625
2007	jiangsu	10	0.980907	2553.72	26018.5	12268.1	31770	4677.88	203609780
2008	jiangsu	10	0.905537	3247.49	30982	15300.5	44438	4700.96	238029408
2009	jiangsu	10	1.01405	4017.36	34457.3	18949.9	87286	4726.54	199199190
2010	jiangsu	10	1.0202	4914.06	41425.5	23184.3	138382	4754.68	270538690
2011	jiangsu	10	1.0035	6221.72	49110.3	26692.6	199814	4758.23	312590057
2012	jiangsu	10	0.994488	7027.67	54058.2	30854.2	269944	4759.53	328523522
2013	jiangsu	10	1.00169	7798.47	59753.4	36373.3	239645	4759.89	328801752
2014	jiangsu	10	1.00251	8472.45	65088.3	41938.6	200032	4760.83	341832503
2015	jiangsu	10	0.998018	9687.58	70116.4	46246.9	250290	4758.50	338644778
2016	jiangsu	10	1.00773	9981.96	77388.3	49663.2	231033	4756.22	319053086
2017	jiangsu	10	1.00524	10621	85869.8	53277	227187	4757.80	363026227
2001	zhejiang	11	0.979892	597.3	6898.34	2834.94	8312	2796.65	22976360
2002	zhejiang	11	0.978038	749.9	8003.67	3477.47	10479	2858.56	29410680
2003	zhejiang	11	0.980429	896.77	9705.02	4740.27	14402	2918.74	41594970
2004	zhejiang	11	0.99717	1062.94	11648.7	5781.35	15249	2991.95	58138541
2005	zhejiang	11	0.986147	1265.53	13417.7	6520.07	19056	3100.76	76802448
2006	zhejiang	11	0.988353	1471.86	15718.5	7590.22	30968	3172.38	100890558
2007	zhejiang	11	0.980489	1806.79	18753.7	8420.43	42069	3405.01	128263973
2008	zhejiang	11	0.917655	2208.58	21462.7	9323	52953	3486.53	154296230
2009	zhejiang	11	0.975542	2653.35	22990.3	10742.3	79945	3591.98	133012950
2010	zhejiang	11	1.03706	3207.88	27722.3	12376	114643	3636.02	180464783
2011	zhejiang	11	0.975731	3842.59	32318.8	14185.3	130190	3674.11	216349491
2012	zhejiang	11	0.985974	4161.88	34665.3	17649.4	188463	3691.24	224517144
2013	zhejiang	11	0.993866	4730.47	37756.6	20782.1	202350	3708.73	248746241
2014	zhejiang	11	0.984163	5159.57	40173	24262.8	188544	3714.15	273327046
2015	zhejiang	11	1.01445	6645.98	42886.5	27323.3	234983	3733.65	276332114
2016	zhejiang	11	0.995773	6974.26	47251.4	30276.1	221456	3760.00	267863753
2017	zhejiang	11	1.01349	7530.32	51768.3	31696	213805	3796.00	286793275
2001	anhui	12	0.994325	403.8	3246.71	893.37	1278	3463.0	2282260
2002	anhui	12	0.959111	456.86	3519.72	1074.46	1419	3500.5	2453130
2003	anhui	12	0.978252	507.44	3923.11	1418.69	1610	3544.9	3063630
2004	anhui	12	0.989547	601.53	4759.3	1935.25	1607	3605.2	3936813
2005	anhui	12	0.999678	713.06	5350.17	2525.11	1939	3670	5188504
2006	anhui	12	0.993752	940.23	6112.5	3533.56	2235	3741	6837748
2007	anhui	12	0.983184	1243.83	7360.92	5087.53	3413	3818	8813734
2008	anhui	12	0.994169	1647.13	8851.66	6746.96	4346	3916	11364111
2009	anhui	12	0.985901	2141.92	10062.8	8990.73	8594	3988	8886490
2010	anhui	12	0.991349	2587.61	12359.3	11542.9	16012	4050.0	12412888
2011	anhui	12	0.990097	3302.99	15300.6	12455.7	32681	4120.9	17082639
2012	anhui	12	0.999151	3961.01	17212	15425.8	43321	4206.8	26748502
2013	anhui	12	0.972626	4349.69	19229.3	18621.9	48849	4275.9	28251314
2014	anhui	12	1.00237	4664.1	20848.8	21875.6	48380	4311.0	31485371
2015	anhui	12	1.00277	5239.01	22005.6	24386	59039	4342.1	32270174
2016	anhui	12	1.00106	5522.95	24407.6	27033.4	60983	4361.6	28446682
2017	anhui	12	1.00332	6203.81	27018	29275.1	58213	4377.9	30596115
2001	fujian	13	0.94959	373.19	4072.85	1172.91	3296	1677.79	13925840
2002	fujian	13	0.979261	397.56	4467.55	1253.08	4001	1711.32	17370630
2003	fujian	13	0.928406	452.3	4983.67	1496.37	5377	1756.71	21131730
2004	fujian	13	0.973487	516.68	5763.35	1892.92	4758	1814.03	29394755
2005	fujian	13	0.956727	593.07	6554.69	2316.72	5147	1868.50	34841868
2006	fujian	13	0.983154	728.7	7583.85	2981.82	6412	1949.58	41261744
2007	fujian	13	0.878591	910.64	9248.53	4287.75	7761	2015.33	49937573
2008	fujian	13	0.959551	1137.72	10823	5207.68	7937	2079.78	56991843
2009	fujian	13	1.01041	1411.82	12236.5	6231.2	11282	2168.86	53319110
2010	fujian	13	0.989862	1695.09	14737.1	8199.12	18063	2241.59	71493128
2011	fujian	13	1.00624	2198.18	17560.2	9910.89	21857	2459.99	92837782
2012	fujian	13	1.0266	2607.5	19701.8	12439.9	30497	2568.93	97832594
2013	fujian	13	1.00034	3068.8	21868.5	15327.4	37511	2555.86	106474420
2014	fujian	13	0.97806	3306.7	24055.8	18177.9	37857	2648.51	113452293
2015	fujian	13	0.986491	4001.58	25979.8	21301.4	61621	2768.41	112680109
2016	fujian	13	0.997894	4275.4	28810.6	23237.3	67142	2797.03	103677985
2017	fujian	13	1.00982	4684.15	32182.1	26416.3	68304	2805.74	104916672
2001	jiangxi	14	0.989305	283.71	2175.68	631.84	999	2054.8	1039040
2002	jiangxi	14	0.965	341.38	2450.48	889.04	1044	2130.6	1051980
2003	jiangxi	14	1.0477	382.1	2807.41	1303.22	1238	2168.2	1504900
2004	jiangxi	14	0.964841	454.06	3456.7	1713.2	1169	2214.0	1994754
2005	jiangxi	14	0.985993	563.95	4056.76	2176.6	1361	2276.7	2439340
2006	jiangxi	14	0.995153	696.44	4820.53	2683.57	1536	2321.1	3753018
2007	jiangxi	14	0.981982	905.06	5800.25	3301.94	2069	2369.6	5444587
2008	jiangxi	14	0.984907	1210.07	6971.05	4745.43	2295	2404.5	7726656
2009	jiangxi	14	0.920964	1562.37	7655.18	6643.14	2915	2445.2	7368490
2010	jiangxi	14	1.14264	1923.26	9451.26	8772.27	4349	2498.8	13416063
2011	jiangxi	14	1.21835	2534.6	11702.8	9087.6	5550	2532.6	21876063
2012	jiangxi	14	0.996054	3019.22	12948.9	10774.2	7985	2556.0	25112787
2013	jiangxi	14	0.98689	3470.3	14410.2	12850.2	9970	2588.7	28166652
2014	jiangxi	14	0.958187	3882.7	15714.6	15079.3	13831	2603.3	32025319
2015	jiangxi	14	1.03611	4412.55	16723.8	17388.1	24161	2615.8	33116737
2016	jiangxi	14	1.01461	4617.4	18499	19694.2	31472	2637.6	29798398
2017	jiangxi	14	0.997727	5111.47	20006.3	22085.3	33029	2645.6	32488265
2001	shandong	15	0.97027	753.78	9195.04	2788.68	6725	5475.3	18120670
2002	shandong	15	0.913684	860.65	10275.5	3483.31	7293	5527.0	21107830
2003	shandong	15	0.935265	1010.64	12078.1	5315.14	9067	5620.6	26557060
2004	shandong	15	1.00741	1189.37	15021.8	6970.62	9733	5728.1	35844519
2005	shandong	15	0.985525	1466.23	18366.9	9307.3	10743	5840.7	46122893
2006	shandong	15	0.966095	1833.44	21900.2	11111.4	15937	5960.0	58598337
2007	shandong	15	0.981444	2261.85	25776.9	12537.7	22821	6081.4	75110105
2008	shandong	15	0.941693	2704.66	30933.3	15435.9	26688	6187.6	93194785
2009	shandong	15	1.01042	3267.67	33896.7	19034.5	34513	6294.2	79490710
2010	shandong	15	1.01216	4145.03	39169.9	23280.5	51490	6401.9	104225604
2011	shandong	15	1.00857	5002.07	45361.8	26749.7	58844	6485.6	125712568
2012	shandong	15	0.998166	5904.52	50013.2	31256	75496	6554.3	128709205
2013	shandong	15	1.02172	6688.8	55230.3	36789.1	76976	6580.4	134190125
2014	shandong	15	1.00524	7177.31	59426.6	42495.6	72818	6606.5	144708654
2015	shandong	15	0.987282	8250.01	63002.3	48312.4	98101	6632.5	143925676
2016	shandong	15	1.00645	8755.21	68024.5	53322.9	98093	6649.7	137096088
2017	shandong	15	1.00549	9258.4	72634.1	55202.7	100522	6560.6	147037464
2001	henan	16	0.956455	508.58	5533.01	1544.06	2582	5517	1704910
2002	henan	16	0.989387	629.18	6035.48	1725.93	2590	5522	2118620
2003	henan	16	1.05435	716.6	6867.7	2262.97	2961	5536	2979290
2004	henan	16	0.983821	879.96	8553.79	3099.38	3318	5587	4174640
2005	henan	16	0.980276	1116.04	10587.4	4311.63	3748	5662	5087533
2006	henan	16	0.967458	1440.09	12362.8	5904.71	5242	5719	6634402
2007	henan	16	0.995629	1870.61	15012.5	8010.11	6998	5773	8374916
2008	henan	16	0.97462	2281.61	18018.5	10490.6	9133	5835	10718897
2009	henan	16	0.984687	2905.76	19480.5	13704.5	11425	5949	7345380
2010	henan	16	0.987139	3416.14	23092.4	16585.9	16539	6042	10529372
2011	henan	16	1.01408	4248.82	26931	17769	19259	6198	19239910
2012	henan	16	0.981384	5006.4	29599.3	21450	26791	6288	29676445
2013	henan	16	0.97206	5582.31	32191.3	26087.5	29482	6387	35987102
2014	henan	16	0.989364	6028.69	34938.2	30782.2	33366	6520	39383031
2015	henan	16	1.0353	6799.35	37002.2	35660.3	47766	6636	43061365
2016	henan	16	1.00317	7453.74	40471.8	40415.1	49145	6726	42805509
2017	henan	16	1.00084	8215.52	44552.8	44496.9	55407	6767	47030963
2001	hubei	17	0.909984	484.4	3880.53	1486.55	2204	3414.50	1796720
2002	hubei	17	0.973005	511.39	4212.82	1605.06	2209	3443.00	2098260
2003	hubei	17	1.04631	540.44	4757.45	1809.45	2871	3476.00	2655370
2004	hubei	17	0.980472	646.29	5633.24	2264.81	3280	3507.00	3382194
2005	hubei	17	0.950052	778.72	6590.19	2676.58	3860	3537.00	4428684
2006	hubei	17	1.00622	1047	7617.47	3343.47	4734	3564.00	6260627
2007	hubei	17	0.988549	1277.33	9333.4	4330.36	6616	3584.00	8172939
2008	hubei	17	0.976629	1650.28	11328.9	5647.01	8374	3607.00	11708909
2009	hubei	17	0.962408	2090.92	12961.1	7866.89	11357	3622.00	9978800
2010	hubei	17	1.05123	2501.4	15967.6	10262.7	17362	3645.00	14441795
2011	hubei	17	0.999567	3214.74	19632.3	12557.3	19035	3672.00	19534601
2012	hubei	17	0.976389	3759.79	22250.5	15578.3	24475	3687.00	19398498
2013	hubei	17	1.01362	4371.65	24791.8	19307.3	28760	3692.00	22836208
2014	hubei	17	0.994778	4934.15	27379.2	22915.3	28290	3687.50	26642422
2015	hubei	17	0.976179	6132.84	29550.2	26563.9	38781	3658.00	29211816
2016	hubei	17	1.00828	6422.98	32665.4	30011.7	41822	3633.00	26039342
2017	hubei	17	1.00494	6801.26	35478.1	32282.4	46369	3610.00	30486227
2001	hunan	18	1.01025	431.7	3831.9	1174.3	2401	3607.96	1752810
2002	hunan	18	0.971704	533.02	4151.54	1347.96	2347	3644.52	1795280
2003	hunan	18	0.899523	573.75	4659.99	1590.32	3175	3694.78	2145850
2004	hunan	18	1.03585	719.54	5641.94	2072.56	3281	3747.10	3106434
2005	hunan	18	0.968498	873.42	6596.1	2629.07	3659	3801.48	3747136
2006	hunan	18	0.990698	1064.52	7688.67	3175.52	5608	3842.17	5091822
2007	hunan	18	1.00072	1357.03	9439.6	4154.76	5687	3883.41	6515397
2008	hunan	18	0.98373	1765.22	11555	5534.04	6133	3910.06	8412884
2009	hunan	18	0.997939	2210.44	13059.7	7703.38	8309	3935.21	5492030
2010	hunan	18	0.988199	2702.48	16038	9663.58	13873	3982.73	7955989
2011	hunan	18	0.995139	3520.76	19669.6	11880.9	16064	4005.03	9903796
2012	hunan	18	0.992957	4119	22154.2	14523.2	23212	4019.31	12602200
2013	hunan	18	0.997083	4690.89	24621.7	17841.4	24392	4036.45	14821196
2014	hunan	18	0.985425	5017.38	27037.3	21242.9	26637	4044.13	19943002
2015	hunan	18	1.00073	5728.72	28902.2	25045.1	34075	3980.30	19137092
2016	hunan	18	1.00352	6339.16	31551.4	28353.3	34050	3920.41	17692536
2017	hunan	18	1.0168	6869.39	33903	31959.2	37916	3817.22	23170836
2001	guangdong	19	0.969678	1321.33	12039.2	3484.43	18259	4058.63	95426090
2002	guangdong	19	0.929887	1521.08	13502.4	3850.78	22761	4134.37	118462740
2003	guangdong	19	0.965023	1695.63	15844.6	4813.2	29235	4395.93	152848230
2004	guangdong	19	0.97309	1852.95	18864.6	5870.02	31446	4681.89	191571044
2005	guangdong	19	0.969811	2289.07	22557.4	6977.93	36894	5022.97	238158830
2006	guangdong	19	1.00456	2553.34	26587.8	7973.37	43516	5177.02	301946429
2007	guangdong	19	0.982929	3159.57	31777	9294.26	56451	5341.50	369316088
2008	guangdong	19	0.879292	3778.57	36796.7	10868.7	62031	5471.72	405664468
2009	guangdong	19	1.0209	4334.37	39482.6	12933.1	83621	5688.62	358954890
2010	guangdong	19	1.12791	5421.54	46013.1	15623.7	119343	5870.48	453191160
2011	guangdong	19	1.00404	6712.4	53210.3	17069.2	128413	5960.74	531926569
2012	guangdong	19	1.01792	7387.86	57067.9	18751.5	153598	5965.95	574050767
2013	guangdong	19	1.02609	8411	62474.8	22308.4	170430	6117.68	636363845
2014	guangdong	19	1.00507	9152.64	67809.9	26293.9	179953	6183.23	646087011
2015	guangdong	19	0.987328	12827.8	72812.6	30343	241176	6219.31	643172084
2016	guangdong	19	0.994478	13446.1	80854.9	33303.6	259032	6279.22	598601986
2017	guangdong	19	1.00631	15037.5	89705.2	37761.8	332652	6340.79	622868368
2001	guangxi	20	0.993021	351.65	2279.34	655.63	1099	2578	1235360
2002	guangxi	20	0.977458	419.86	2523.73	750.33	1054	2589	1507460
2003	guangxi	20	0.965119	443.6	2821.11	921.3	1331	2601	1969920
2004	guangxi	20	1.01505	507.47	3433.5	1236.51	1272	2649	2385585
2005	guangxi	20	0.992886	611.48	3984.1	1661.17	1225	2703	2876634
2006	guangxi	20	0.99018	729.52	4746.16	2198.72	1442	2760	3592972
2007	guangxi	20	0.983158	985.94	5823.41	2939.67	1907	2769	5109157
2008	guangxi	20	0.977534	1297.11	7021	3756.41	2228	2799	7347444
2009	guangxi	20	0.995798	1621.82	7759.16	5237.24	2702	2848.64	8375370
2010	guangxi	20	1.03446	2007.59	9569.85	7057.56	3647	2903	9603073
2011	guangxi	20	0.978942	2545.28	11720.9	7990.66	4402	2936	12457758
2012	guangxi	20	0.994535	2985.23	13035.1	9808.6	5900	2768	15467752
2013	guangxi	20	1.00188	3208.67	14449.9	11907.7	7884	2782	18693257
2014	guangxi	20	1.00589	3479.79	15672.9	13843.2	9664	2795	24327425
2015	guangxi	20	0.997058	4065.51	16803.1	16227.8	13573	2820	27933976
2016	guangxi	20	0.993397	4441.7	18317.6	18236.8	14858	2841	22926413
2017	guangxi	20	1.0089	4908.55	18523.3	20499.1	15270	2842	28091189
2001	hainan	21	0.957447	78.94	579.17	213.32	303	338.39	797970
2002	hainan	21	1.01094	92.26	642.73	225.41	199	349.89	819300
2003	hainan	21	0.880342	105.4	713.96	280.02	296	360.34	866200
2004	hainan	21	0.987828	127.2	819.66	317.05	278	367.74	1092547
2005	hainan	21	1.02514	151.24	918.75	367.17	200	379.55	1022544
2006	hainan	21	0.921739	174.54	1065.67	423.89	248	389.03	1375621
2007	hainan	21	0.910776	245.2	1254.17	502.37	296	397.46	1364458
2008	hainan	21	0.869803	357.97	1503.06	705.42	341	408.36	1587198
2009	hainan	21	0.913922	486.06	1654.21	988.32	630	424.56	1308630
2010	hainan	21	1.01901	581.34	2064.5	1317.04	714	439.65	2320330
2011	hainan	21	1.01627	778.8	2522.66	1657.23	765	459.22	2541616
2012	hainan	21	1.14642	911.67	2855.54	2145.4	1093	483.90	3136100
2013	hainan	21	1.01785	1011.17	3177.56	2697.93	1331	514.56	3706486
2014	hainan	21	0.975478	1099.74	3500.72	3112.23	1597	543.10	4416742
2015	hainan	21	1.03434	1239.43	3702.76	3451.22	2061	555.77	3743036
2016	hainan	21	1.00635	1376.48	4053.2	3890.45	1939	558.14	2125799
2017	hainan	21	0.973666	1443.97	4462.54	4244.4	2133	583.88	4365906
2001	chongqing	22	0.978393	237.55	1976.86	697.03	1197	1616.08	1102550
2002	chongqing	22	0.993785	305.86	2232.86	899.26	1761	1551.77	1091010
2003	chongqing	22	0.986986	341.58	2555.72	1161.51	2883	1499.99	1584990
2004	chongqing	22	0.974542	395.72	3034.58	1537.05	3601	1471.34	2090747
2005	chongqing	22	0.989333	487.35	3467.72	1933.16	3591	1456.30	2520578
2006	chongqing	22	0.973748	594.25	3907.23	2407.36	4590	1454.77	3351023
2007	chongqing	22	0.930016	768.39	4676.13	3127.74	4994	1468.87	4507207
2008	chongqing	22	0.820727	1016.01	5793.66	3979.59	4820	1492.43	5722049
2009	chongqing	22	1.09668	1292.09	6530.01	5214.28	7501	1513.00	4280070
2010	chongqing	22	1.01804	1709.04	7925.58	6688.91	12080	1539.95	7488937
2011	chongqing	22	0.999432	2570.24	10011.4	7473.38	15525	1585.16	19831648
2012	chongqing	22	0.999595	3046.36	11409.6	8736.2	20364	1633.14	38567582
2013	chongqing	22	0.996434	3062.28	12783.3	10435.2	24828	1683.51	46795899
2014	chongqing	22	0.996254	3304.39	14262.6	12285.4	24312	1696.94	63400799
2015	chongqing	22	0.988571	3792	15717.3	14353.2	38914	1707.37	55186832
2016	chongqing	22	0.995436	4001.81	17740.6	16048.1	42738	1717.52	40654379
2017	chongqing	22	1.00843	4336.28	19424.7	17537	34780	1714.55	42595258
2001	sichuan	23	1.02432	594.1	4293.49	1617.52	3357	4664.80	1582720
2002	sichuan	23	0.963993	701.62	4725.01	1902.72	3403	4667.60	2711630
2003	sichuan	23	1.10891	732.3	5333.09	2336.34	4051	4683.50	3208710
2004	sichuan	23	1.01155	895.25	6379.63	2818.42	4430	4691.00	3979702
2005	sichuan	23	1.01261	1082.18	7385.1	3585.18	4606	4702.00	4701605
2006	sichuan	23	0.993667	1347.4	8690.24	4412.88	7138	4715.00	6624118
2007	sichuan	23	1.00192	1759.13	10562.4	5639.8	9935	4731.10	8605959
2008	sichuan	23	0.974468	2948.83	12601.2	7127.81	13369	4740.00	13132485
2009	sichuan	23	0.993695	3590.72	14151.3	11371.9	20132	4756.62	14169450
2010	sichuan	23	1.0088	4257.98	17185.5	13116.7	32212	4772.53	18840625
2011	sichuan	23	0.998695	4674.92	21026.7	14222.2	28446	4785.47	29027285
2012	sichuan	23	1.00859	5450.99	23872.8	17040	42218	4798.30	38469065
2013	sichuan	23	0.994172	6220.91	26392.1	20326.1	46171	4817.31	41949056
2014	sichuan	23	0.998213	6796.61	28536.7	23318.6	47120	4833.00	44839133
2015	sichuan	23	0.990173	7497.51	30053.1	25525.9	64953	4847.01	33092898
2016	sichuan	23	0.99877	8008.89	32934.5	28812	62445	4860.00	27947617
2017	sichuan	23	1.00215	8694.76	36980.2	31902.1	64006	4872.00	37553430
2001	guizhou	24	0.929234	275.2	1133.27	536.01	642	2068.01	421770
2002	guizhou	24	0.959671	316.67	1243.43	632.97	615	2106.14	441830
2003	guizhou	24	0.967076	332.35	1426.34	748.12	723	2145.00	587980
2004	guizhou	24	1.02304	418.42	1677.8	865.23	737	2186.00	866605
2005	guizhou	24	0.954231	520.73	2005.42	998.25	925	1944.29	858937
2006	guizhou	24	1.02381	610.64	2338.98	1197.43	1337	1953.24	1038435
2007	guizhou	24	0.939302	795.4	2884.11	1488.8	1727	1872.64	1465466
2008	guizhou	24	0.974856	1053.79	3561.56	1864.45	1728	1867.20	1900775
2009	guizhou	24	0.998927	1372.27	3912.68	2412.02	2084	1841.92	1356610
2010	guizhou	24	0.960167	1631.48	4602.16	3104.92	3086	1770.90	1920180
2011	guizhou	24	1.02597	2249.4	5701.84	4235.92	3386	1792.80	2985087
2012	guizhou	24	1.03051	2755.68	6852.2	5717.8	6059	1825.82	4952229
2013	guizhou	24	1.0023	3082.66	8086.86	7373.6	7915	1864.21	6885975
2014	guizhou	24	0.980816	3542.8	9266.39	9025.75	10107	1909.69	9397257
2015	guizhou	24	1.01623	3939.5	10502.6	10945.5	14115	1946.65	9948624
2016	guizhou	24	0.997586	4262.36	11776.7	13204	10425	1983.72	4742792
2017	guizhou	24	1.0083	4612.52	13540.8	15503.9	12559	2023.20	5793711
2001	yunnan	25	0.983685	496.43	2138.31	738.45	1347	2322.5	1244060
2002	yunnan	25	0.992512	526.89	2312.82	814.61	1128	2341.3	1429710
2003	yunnan	25	1.00961	587.35	2556.02	1000.12	1213	2353.3	1676590
2004	yunnan	25	1.02446	663.64	3081.91	1291.54	1264	2401.4	2238611
2005	yunnan	25	0.958473	766.31	3462.73	1777.63	1381	2461.3	2641725
2006	yunnan	25	1.01271	893.58	3988.14	2208.6	1637	2517.6	3391492
2007	yunnan	25	0.979235	1135.22	4772.52	2759.03	2139	2573.8	4768279
2008	yunnan	25	1.02165	1470.24	5692.12	3435.93	2021	2638.37	4984413
2009	yunnan	25	0.975231	1952.34	6169.75	4526.37	2923	2684.8	4513250
2010	yunnan	25	1.01036	2285.72	7224.18	5528.71	3823	2765.9	7605767
2011	yunnan	25	0.99711	2929.6	8893.12	6191	4199	2857.24	9472454
2012	yunnan	25	0.994864	3572.66	10309.5	7831.1	5853	2881.9	10017371
2013	yunnan	25	1.02482	4096.51	11832.3	9968.3	6804	2912.36	15671378
2014	yunnan	25	1.00518	4437.98	12814.6	11498.5	8124	2962.25	18787465
2015	yunnan	25	1.00409	4712.83	13619.2	13500.6	11658	2942.5	16615633
2016	yunnan	25	0.996731	5018.86	14788.4	16119.4	12032	2998.89	11490314
2017	yunnan	25	0.996148	5712.97	16376.3	18936	14230	2992.65	11466510
2001	xizang	26	0.901961	104.57	139.16	83.26	22	126.33	82370
2002	xizang	26	0.933824	137.84	162.04	106.58	7	130.20	81120
2003	xizang	26	0.89703	145.91	185.09	133.96	16	132.81	121260
2004	xizang	26	0.975904	133.83	220.34	162.36	23	137.32	130224
2005	xizang	26	0.969618	185.45	248.8	181.39	44	143.60	165383
2006	xizang	26	0.944138	200.2	290.76	231.14	81	148.20	222218
2007	xizang	26	0.982971	275.37	341.43	270.34	68	158.15	326364
2008	xizang	26	1.00117	380.66	394.85	309.91	93	163.50	707572
2009	xizang	26	1.03796	470.13	441.36	378.28	292	169.07	375470
2010	xizang	26	0.99285	551.04	507.46	462.67	124	173.39	771029
2011	xizang	26	0.994382	758.11	605.83	516.31	142	185.55	1182849
2012	xizang	26	0.991435	905.34	701.03	670.5	133	202.06	3355184
2013	xizang	26	0.958491	1014.31	815.67	876	121	205.54	3269050
2014	xizang	26	1.02264	1185.51	920.83	1069.23	146	213.68	2100866
2015	xizang	26	0.99322	1381.46	1026.39	1295.68	198	234.73	586909
2016	xizang	26	1.02951	1587.98	1151.41	1596.05	245	254.36	471725
2017	xizang	26	0.976351	1681.94	1310.92	1975.6	420	265.36	433286
2001	shan'xi	27	0.935194	350.05	2010.62	773.43	1354	1785	1108190
2002	shan'xi	27	0.993061	404.91	2253.39	915.35	1524	1874	1376030
2003	shan'xi	27	0.983345	418.2	2587.72	1200.68	1609	1912	1734140
2004	shan'xi	27	0.921328	516.31	3175.58	1508.89	2007	1941	2396577
2005	shan'xi	27	0.880064	638.96	3933.72	1882.18	1894	1976	3076887
2006	shan'xi	27	0.88	824.18	4743.61	2480.69	2473	1986	3629606
2007	shan'xi	27	0.930129	1053.97	5757.29	3415.02	3451	2013	4675249
2008	shan'xi	27	0.930089	1428.52	7314.58	4614.42	4392	2039	5380817
2009	shan'xi	27	0.934345	1841.64	8169.8	6246.9	6087	2060	3988150
2010	shan'xi	27	1.04052	2218.83	10123.5	7963.67	10034	2074	6208215
2011	shan'xi	27	0.991386	2930.81	12512.3	9431.08	11662	2059	7035026
2012	shan'xi	27	1.01463	3323.8	14453.7	12044.5	14908	2061	8652264
2013	shan'xi	27	1.00714	3665.07	16205.5	14884.1	20836	2058	10225657
2014	shan'xi	27	0.994527	3962.5	17689.9	17191.9	22820	2067	13929798
2015	shan'xi	27	0.999058	4376.06	18021.9	18582.2	33350	2071	14788759
2016	shan'xi	27	1.00497	4389.37	19399.6	20825.2	48455	2073	15837561
2017	shan'xi	27	1.00009	4833.19	21898.8	23819.4	34554	2072	24543806
2001	gansu	28	0.988248	235.46	1125.37	460.37	512	1488.93	476320
2002	gansu	28	0.997321	274.01	1232.03	526.21	397	1500.59	548910
2003	gansu	28	0.996933	300.01	1399.83	619.82	474	1510.85	877200
2004	gansu	28	1.02936	356.94	1688.49	733.94	514	1520.46	996377
2005	gansu	28	0.964551	429.35	1933.98	870.36	547	1391.36	1090995
2006	gansu	28	0.983481	528.59	2277.35	1022.59	832	1401.36	1509601
2007	gansu	28	0.916959	675.34	2703.98	1304.16	1025	1414.76	1658657
2008	gansu	28	0.844924	968.43	3166.82	1712.78	1047	1446.34	1601354
2009	gansu	28	0.822652	1246.28	3387.56	2363	1274	1488.63	735510
2010	gansu	28	1.21249	1468.58	4120.75	3158.34	1868	1499.56	1637785
2011	gansu	28	1.14155	1791.24	5020.37	3965.79	2383	1500.26	2158779
2012	gansu	28	1.00283	2059.56	5650.2	5145	3662	1491.59	3573545
2013	gansu	28	0.983601	2309.62	6330.69	6527.94	4737	1504.97	4677322
2014	gansu	28	0.982843	2541.49	6836.82	7884.13	5097	1519.86	5329482
2015	gansu	28	1.01997	2958.31	6790.32	8754.23	6912	1535.69	5811811
2016	gansu	28	0.991214	3150.03	7200.37	9663.99	7975	1548.74	4062563
2017	gansu	28	0.977171	3304.44	7459.9	5827.75	9672	1553.84	1709788
2001	qinghai	29	0.89916	101.3	300.13	196.35	101	285.66	149130
2002	qinghai	29	0.852518	118.73	340.65	232.35	85	287.72	151000
2003	qinghai	29	0.969529	122.04	390.2	255.62	90	289.80	273890
2004	qinghai	29	0.952596	137.34	466.1	289.18	70	290.42	454762
2005	qinghai	29	0.982796	169.75	543.32	329.81	79	291.04	323198
2006	qinghai	29	0.919598	214.66	648.5	408.54	97	294.19	534200
2007	qinghai	29	1.00226	282.2	797.35	482.84	222	298.56	385913
2008	qinghai	29	0.972628	363.6	1018.62	583.24	228	301.00	419100
2009	qinghai	29	1.00181	486.75	1081.27	798.23	368	303.26	251880
2010	qinghai	29	0.985375	743.4	1350.43	1016.87	264	307.65	466197
2011	qinghai	29	0.997319	967.47	1670.44	1435.58	538	309.18	661823
2012	qinghai	29	1.03255	1159.05	1893.54	1883.4	527	310.89	728764
2013	qinghai	29	0.970796	1228.05	2122.06	2361.09	502	314.21	847264
2014	qinghai	29	0.996215	1347.43	2303.32	2861.23	619	317.30	1127899
2015	qinghai	29	0.999208	1515.16	2417.05	3210.63	1217	321.41	1641967
2016	qinghai	29	0.996559	1524.8	2572.49	3528.05	1357	324.28	1370061
2017	qinghai	29	1.00465	1530.44	2624.83	3883.55	1580	326.97	424174
2001	ningxia	30	0.994932	93.58	337.44	191.08	231	279.0	351840
2002	ningxia	30	0.973361	114.56	377.16	226.98	216	282.4	328180
2003	ningxia	30	0.982363	105.78	445.36	317.99	338	291.4	511950
2004	ningxia	30	0.926316	123.02	537.11	376.2	293	298.8	646262
2005	ningxia	30	0.96466	160.25	612.61	443.25	214	299.6	687424
2006	ningxia	30	0.87439	193.21	725.9	498.75	290	308.1	942623
2007	ningxia	30	1.00475	241.85	919.11	599.8	296	309.5	1085674
2008	ningxia	30	0.969716	324.61	1203.92	828.85	606	303.9	1258368
2009	ningxia	30	0.932607	432.36	1353.31	1075.91	910	328.5	742930
2010	ningxia	30	1.03313	557.53	1689.65	1444.16	1081	326.0	1170002
2011	ningxia	30	0.978931	705.91	2102.21	1644.74	613	339.6	1599430
2012	ningxia	30	0.959799	864.36	2341.29	2096.9	844	344.50	1641117
2013	ningxia	30	1.01453	922.48	2577.57	2651.14	1211	351.30	2552158
2014	ningxia	30	0.987111	1000.45	2752.1	3173.79	1424	357.20	4302851
2015	ningxia	30	0.968678	1138.49	2911.77	3505.45	1865	362.2	2963107
2016	ningxia	30	1.03571	1254.54	3168.59	3794.25	2677	369.2	2486748
2017	ningxia	30	0.995919	1372.78	3443.56	3728.38	4244	375.90	3651071
2001	xinjiang	31	0.965896	263.32	1491.6	706	755	685.38	668490
2002	xinjiang	31	0.993976	361.17	1612.65	800.09	627	701.49	1308500
2003	xinjiang	31	0.963519	368.47	1886.35	973.39	752	721.27	2540550
2004	xinjiang	31	1.03469	421.04	2209.09	1147.15	792	744.49	3046270
2005	xinjiang	31	1.00306	519.02	2604.19	1339.06	921	791.62	5038919
2006	xinjiang	31	0.951094	678.47	3045.26	1567.05	1187	811.75	7139228
2007	xinjiang	31	0.96021	795.15	3523.16	1850.84	1534	830.42	11502170
2008	xinjiang	31	0.916889	1059.36	4183.21	2259.97	1493	847.58	19299100
2009	xinjiang	31	0.894876	1346.91	4277.05	2725.45	1866	866.15	10934560
2010	xinjiang	31	1.03447	1698.91	5437.47	3423.24	2562	894.65	12968652
2011	xinjiang	31	0.978259	2284.49	6610.05	4632.14	2642	953.34	16825724
2012	xinjiang	31	1.03997	2720.07	7505.31	6158.8	3439	1010.44	19345647
2013	xinjiang	31	0.998985	3067.12	8443.84	7732.3	4998	1096.59	22267735
2014	xinjiang	31	0.998141	3317.79	9273.46	9447.74	5238	1135.24	23480763
2015	xinjiang	31	0.994857	3804.87	9324.8	10813	8761	1195.06	17496082
2016	xinjiang	31	0.996706	4138.25	9649.7	10287.5	7116	1263.11	15582165
2017	xinjiang	31	0.985224	4637.24	10882	12089.1	8094	1307.56	17633335
